# Supplementary material for: Evidence of Isomerization in the Michael-Type Thiol-Maleimide Addition: Click Reaction between L-Cysteine and 6-Maleimidehexanoic Acid
Source: MDPI journal article supplement (doi:10.3390/molecules27165064), 2022-08-09
Supplement: s1 [file s1]

## Supplementary Materials

### Evidence of Isomerization in the Michael-Type Thiol-Maleimide Addition: Click Reaction Between L-Cysteine and 6-Maleimidehexanoic acid.

Víctor Alfonso Niño Ramírez <sup>1</sup>, Diego Sebastián Insuasty Cepeda <sup>1</sup>, Zuly Jenny Rivera Monroy<sup>1\*</sup> and Mauricio Maldonado

Table of Contents:

#### 1. Figures:

**Figure S1.** <sup>1</sup>H-NMR spectrum (400MHz, MeOD, 303 K) of compound 1.

**Figure S2.** <sup>13</sup>C-NMR spectrum (400MHz, MeOD, 303 K) of compound 1.

**Figure S3.** MS/MS for TIC of 4.7 min corresponding to compound 1.

**Figure S4.** <sup>1</sup>H-NMR spectrum (400MHz, MeOD, 303 K) of compound 2.

**Figure S5.** <sup>13</sup>C-NMR spectrum (400MHz, MeOD, 303 K) of compound 2.

**Figure S6.** <sup>1</sup>H-NMR COSY spectrum (400MHz, MeOD, 303 K) of compound 2.

**Figure S7.** <sup>1</sup>H-NMR HSQC spectrum (400MHz, MeOD, 303 K) of compound 2.

**Figure S8.** <sup>1</sup>H-NMR HMBC spectrum (400MHz, MeOD, 303 K) of compound 2.

**Figure S9.** MS/MS for TIC of 4.6 min corresponding to compound 2.

**Figure S10.** <sup>1</sup>H-NMR spectrum (400MHz, MeOD, 303 K) of mix products.

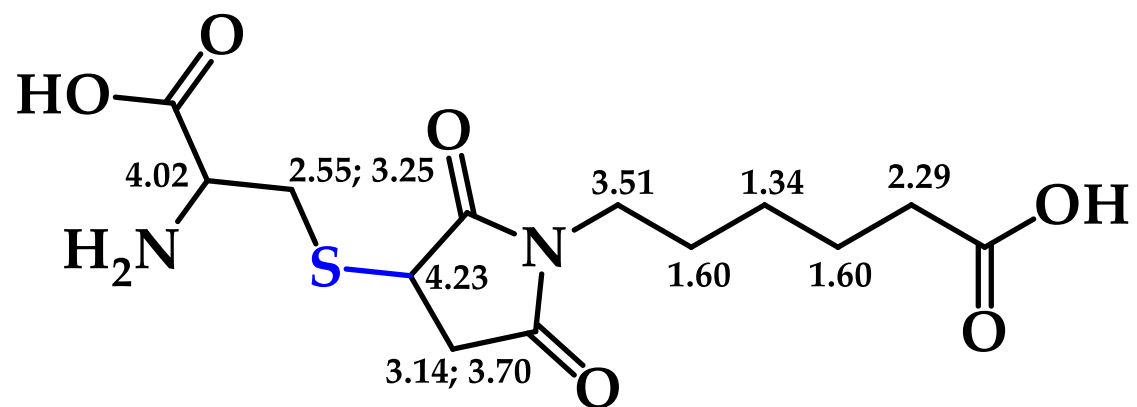

COMPOUND 1: Cys-S-Mhx

P-2 (RMN-210166) BBO  
P-2 (RMN-210166) BBO  
Neo Avance 1H-MeOD  
24 de Marzo de 2021

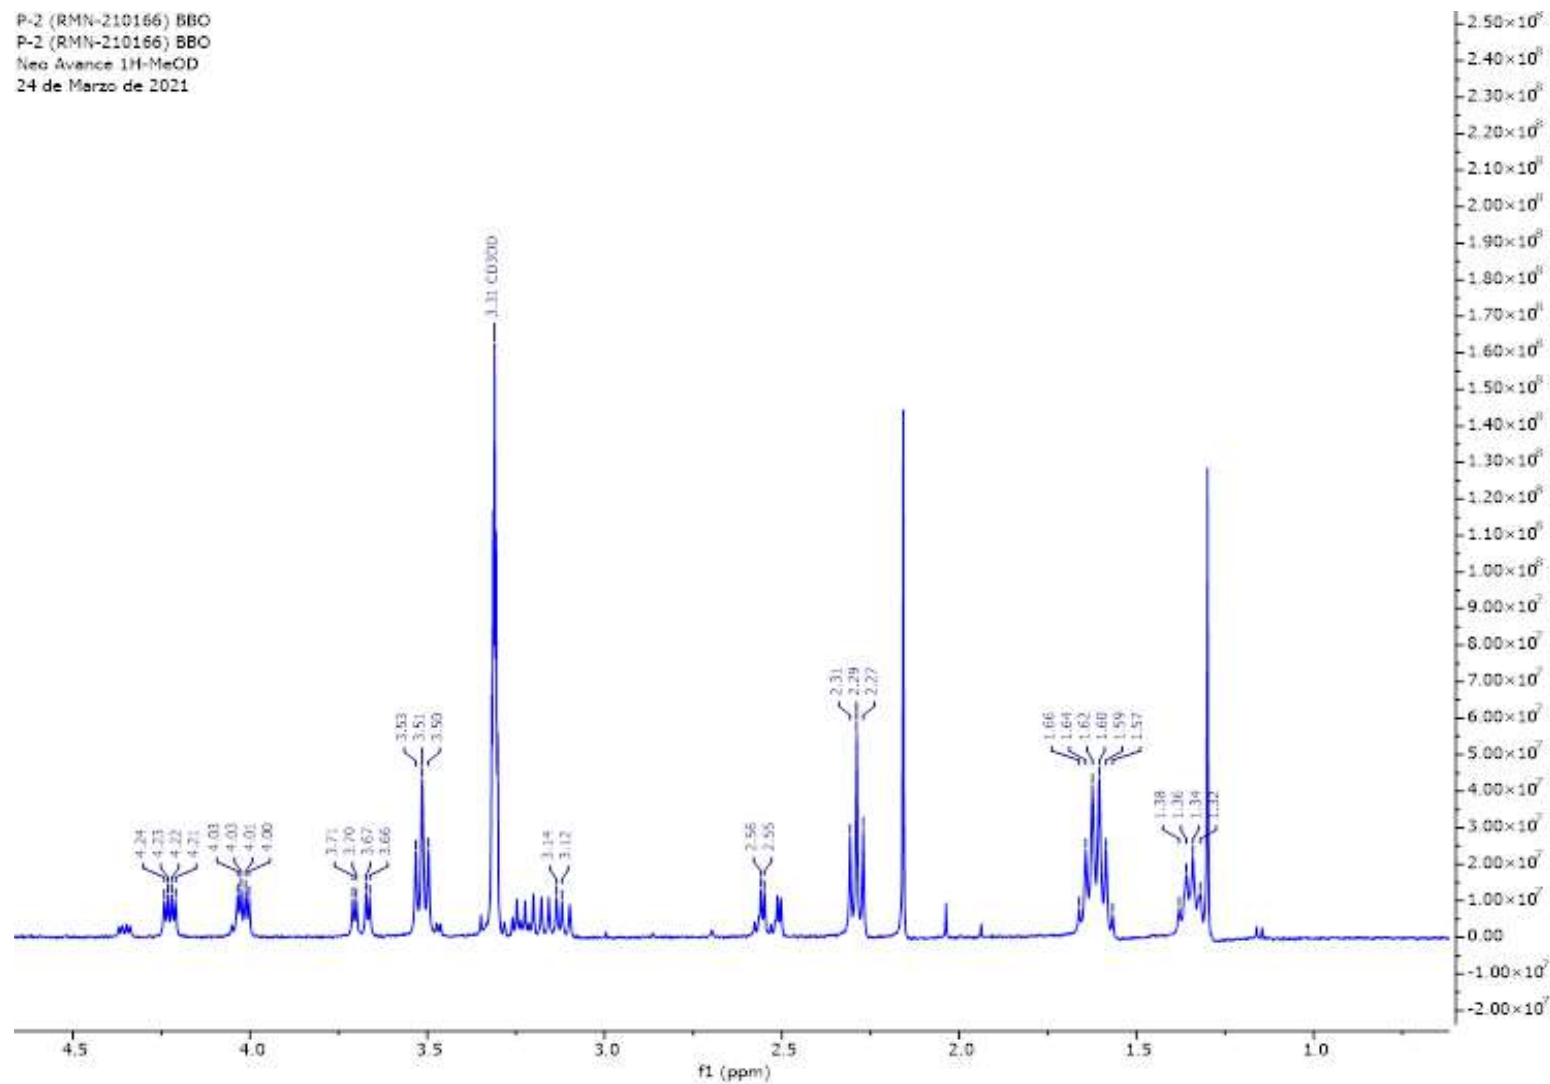

**Figure S1.**  $^1\text{H}$ -NMR spectrum (400MHz, MeOD, 303 K) of compound 1.

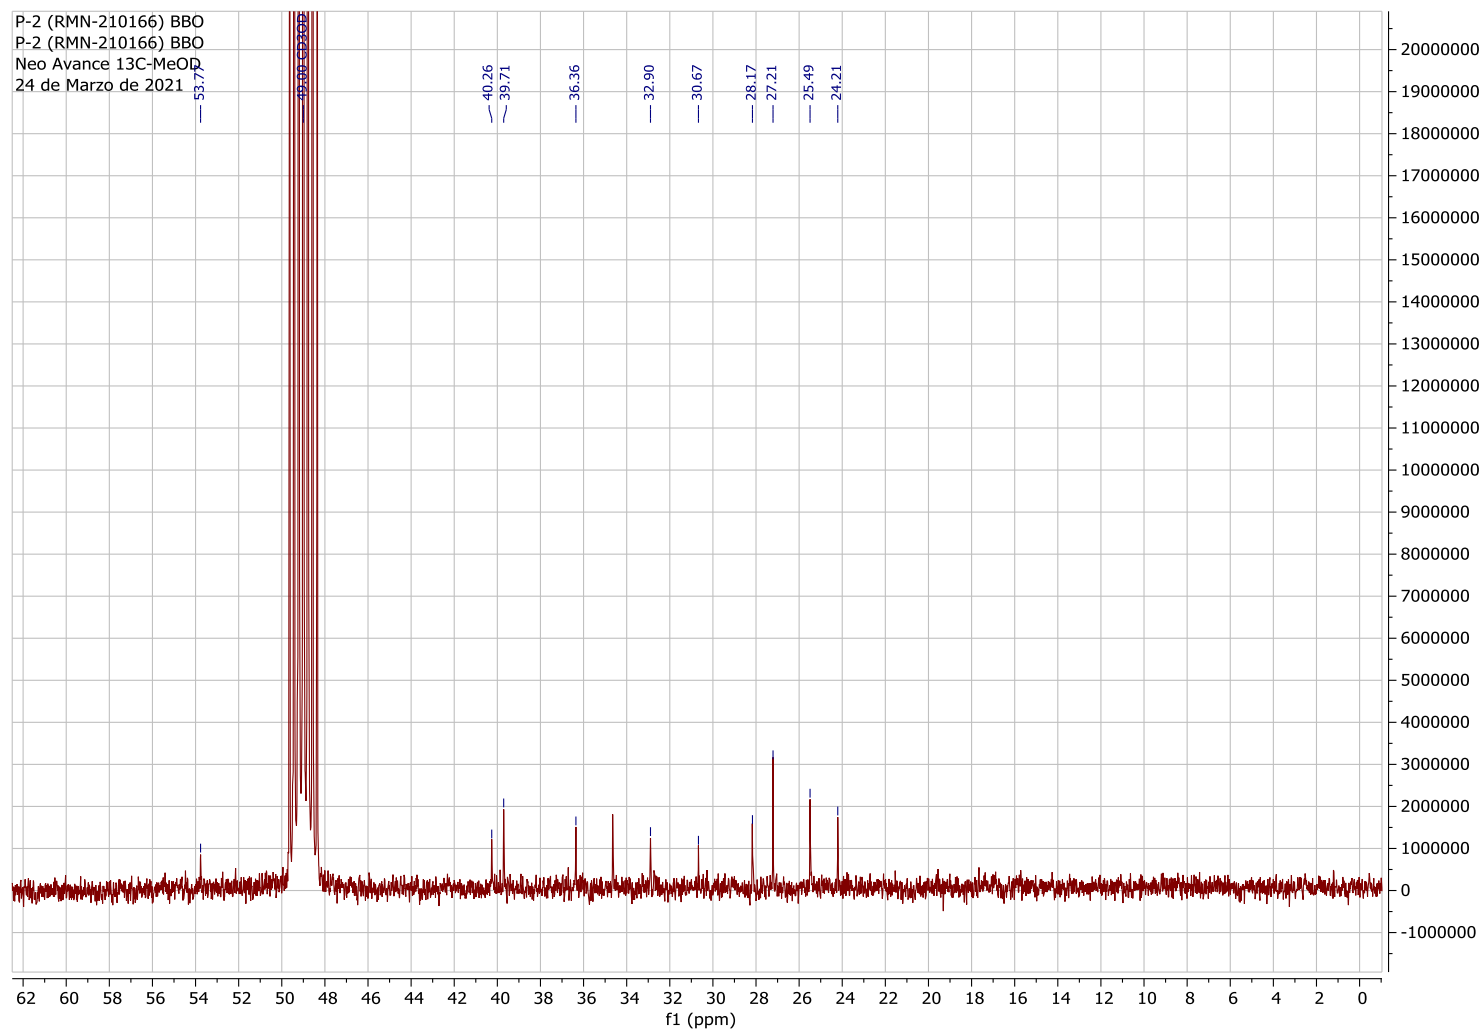

**Figure S2.**  $^{13}\text{C}$ -NMR spectrum (400MHz, MeOD, 303 K) of compound **1**.

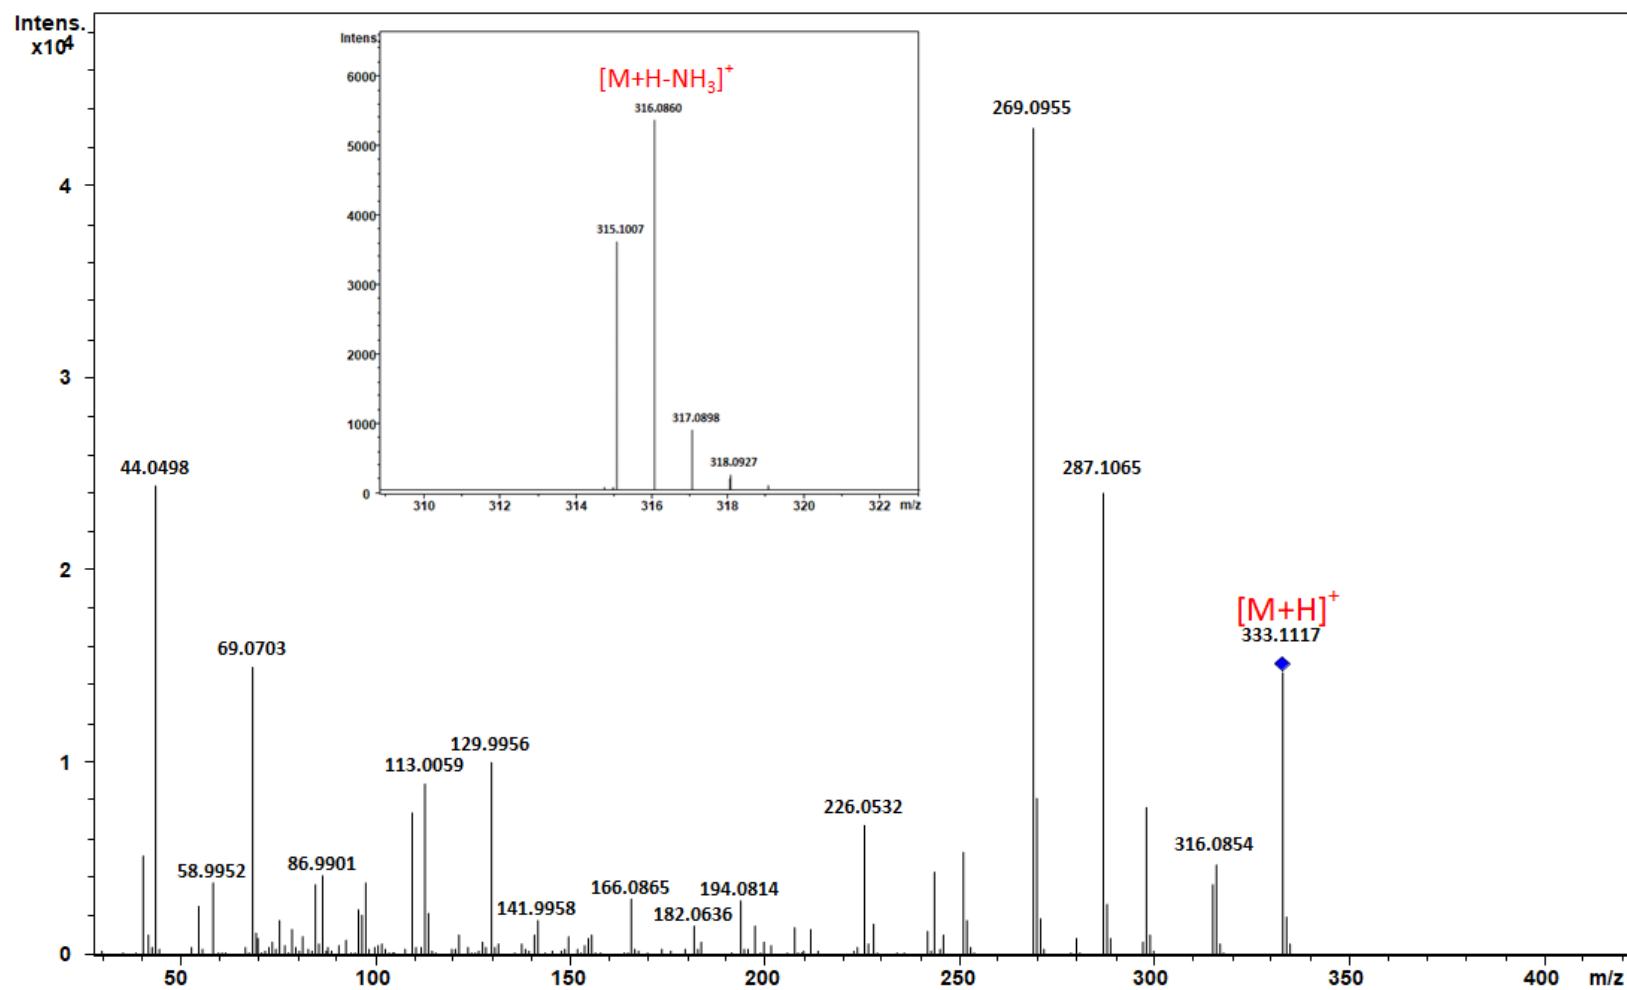

Figure S3. MS/MS for TIC of 4.7 min corresponding to compound 1.

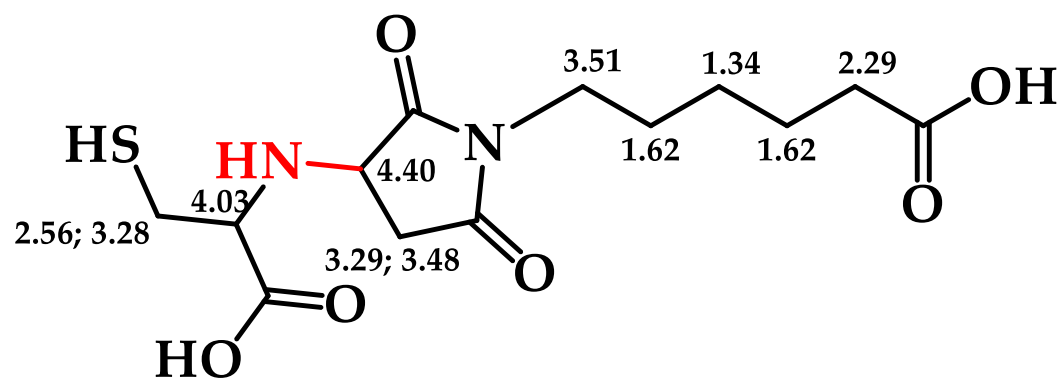

COMPOUND 2: Cys-N-Mhx

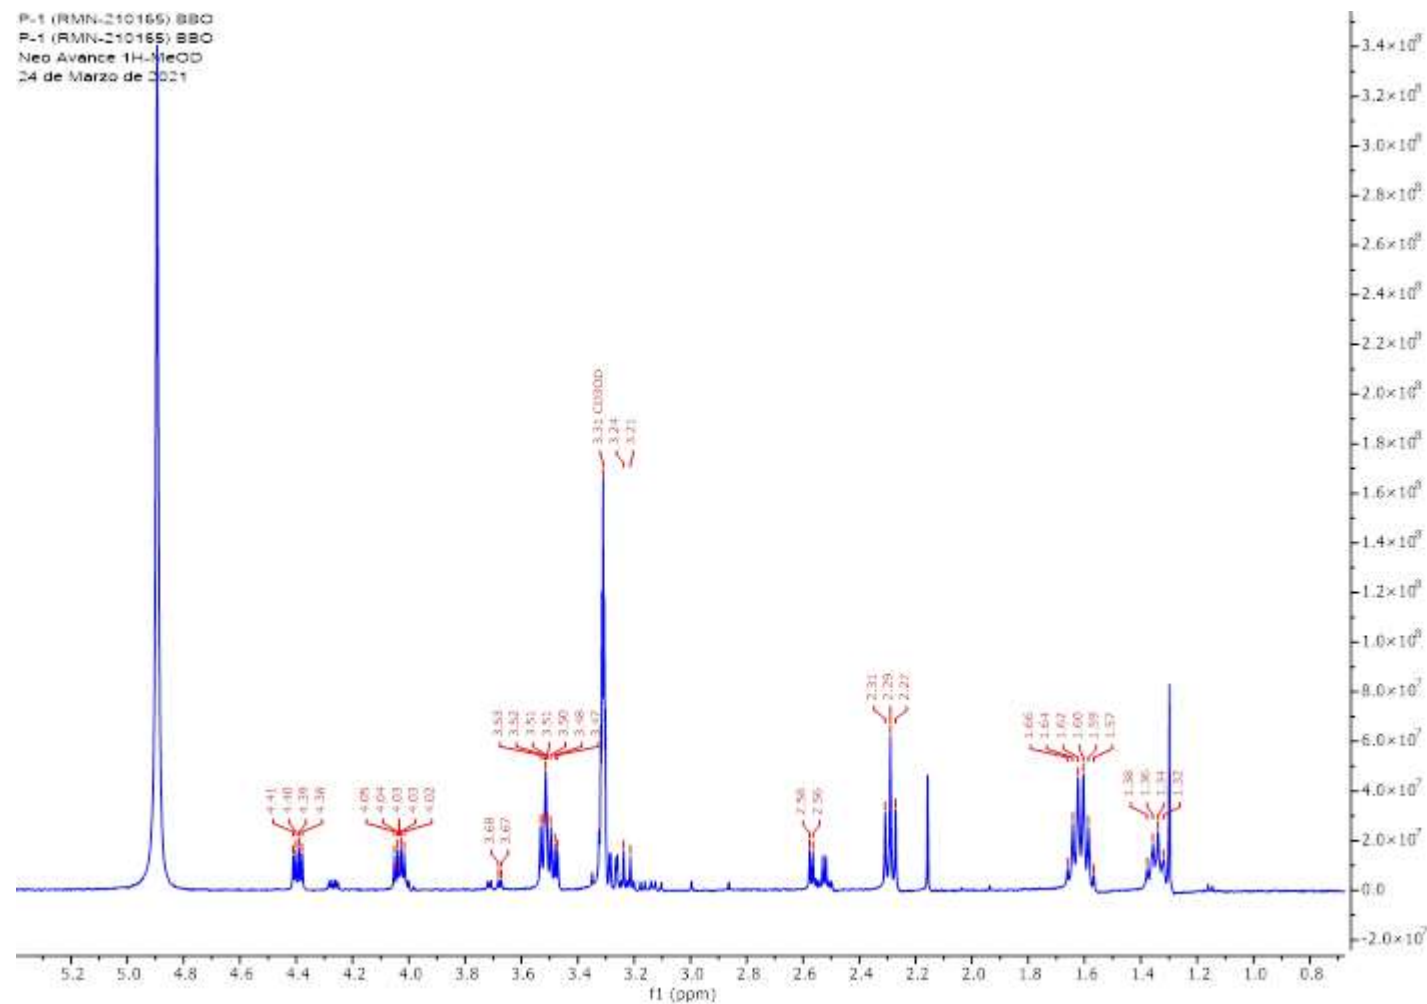

**Figure S4.** <sup>1</sup>H-NMR spectrum (400MHz, MeOD, 303 K) of compound 2.

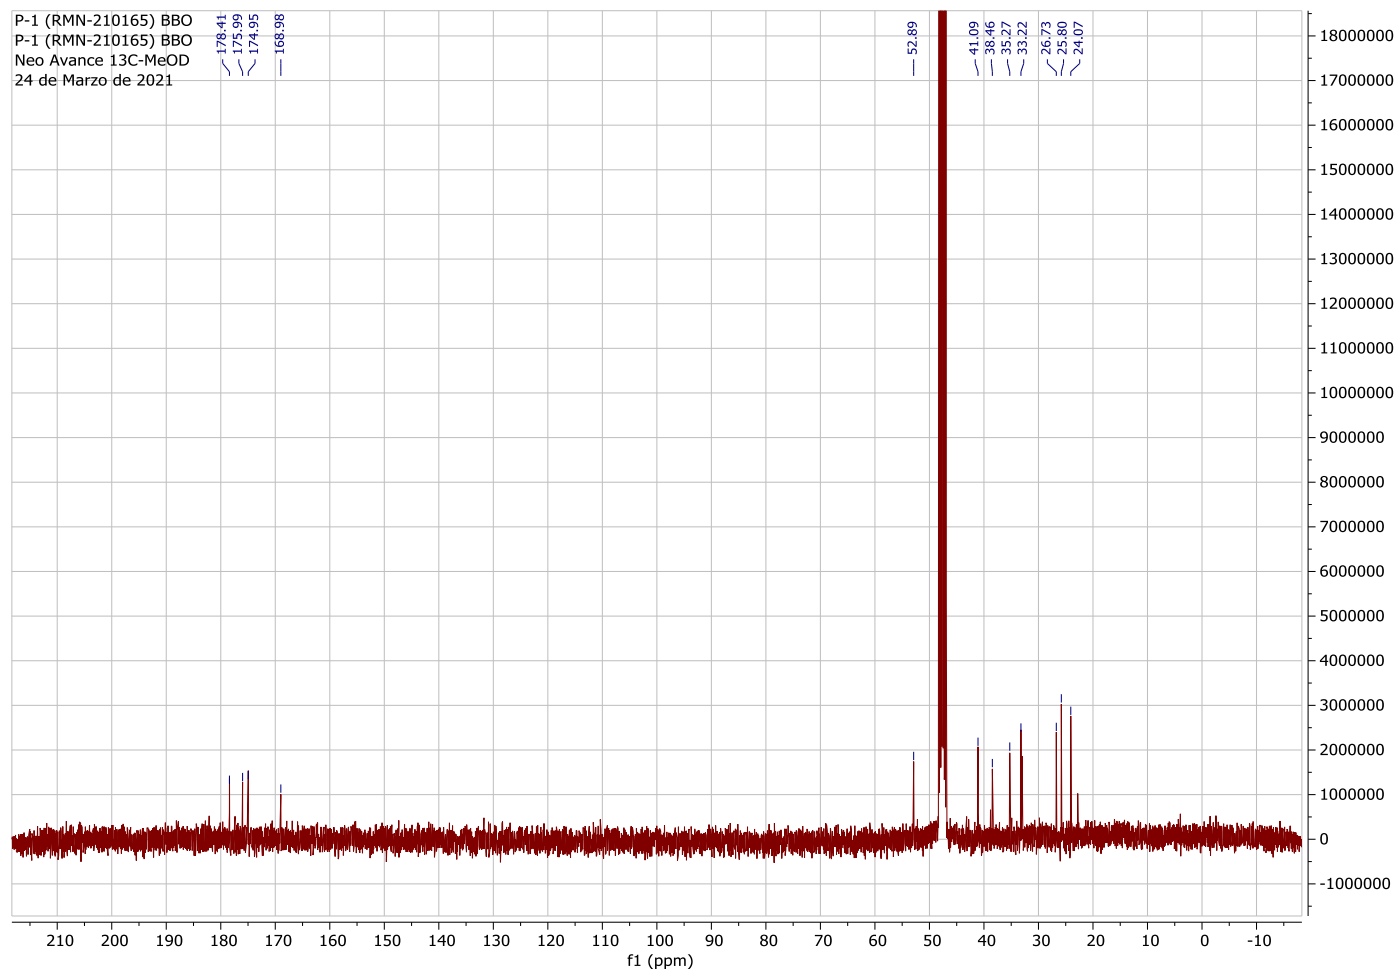

**Figure S5.**  $^{13}\text{C}$ -NMR spectrum (400MHz, MeOD, 303 K) of compound **2**.



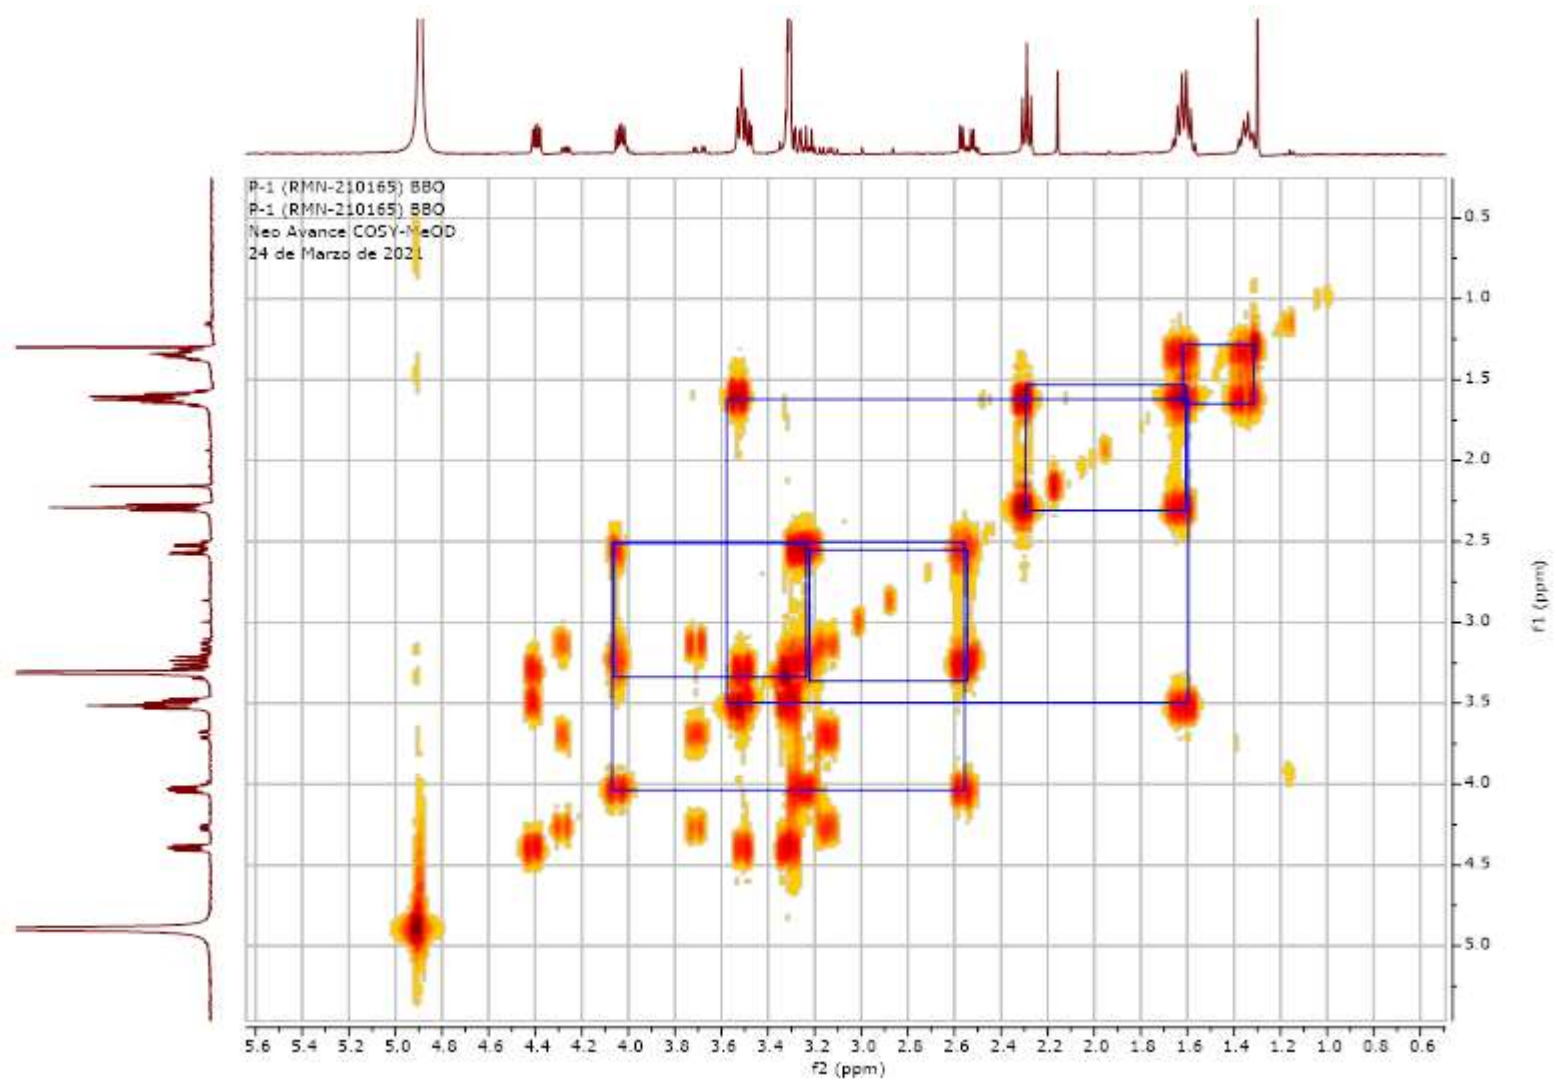

**Figure S6.**  $^1\text{H}$ -NMR COSY spectrum (400MHz, MeOD, 303 K) of compound **2**.

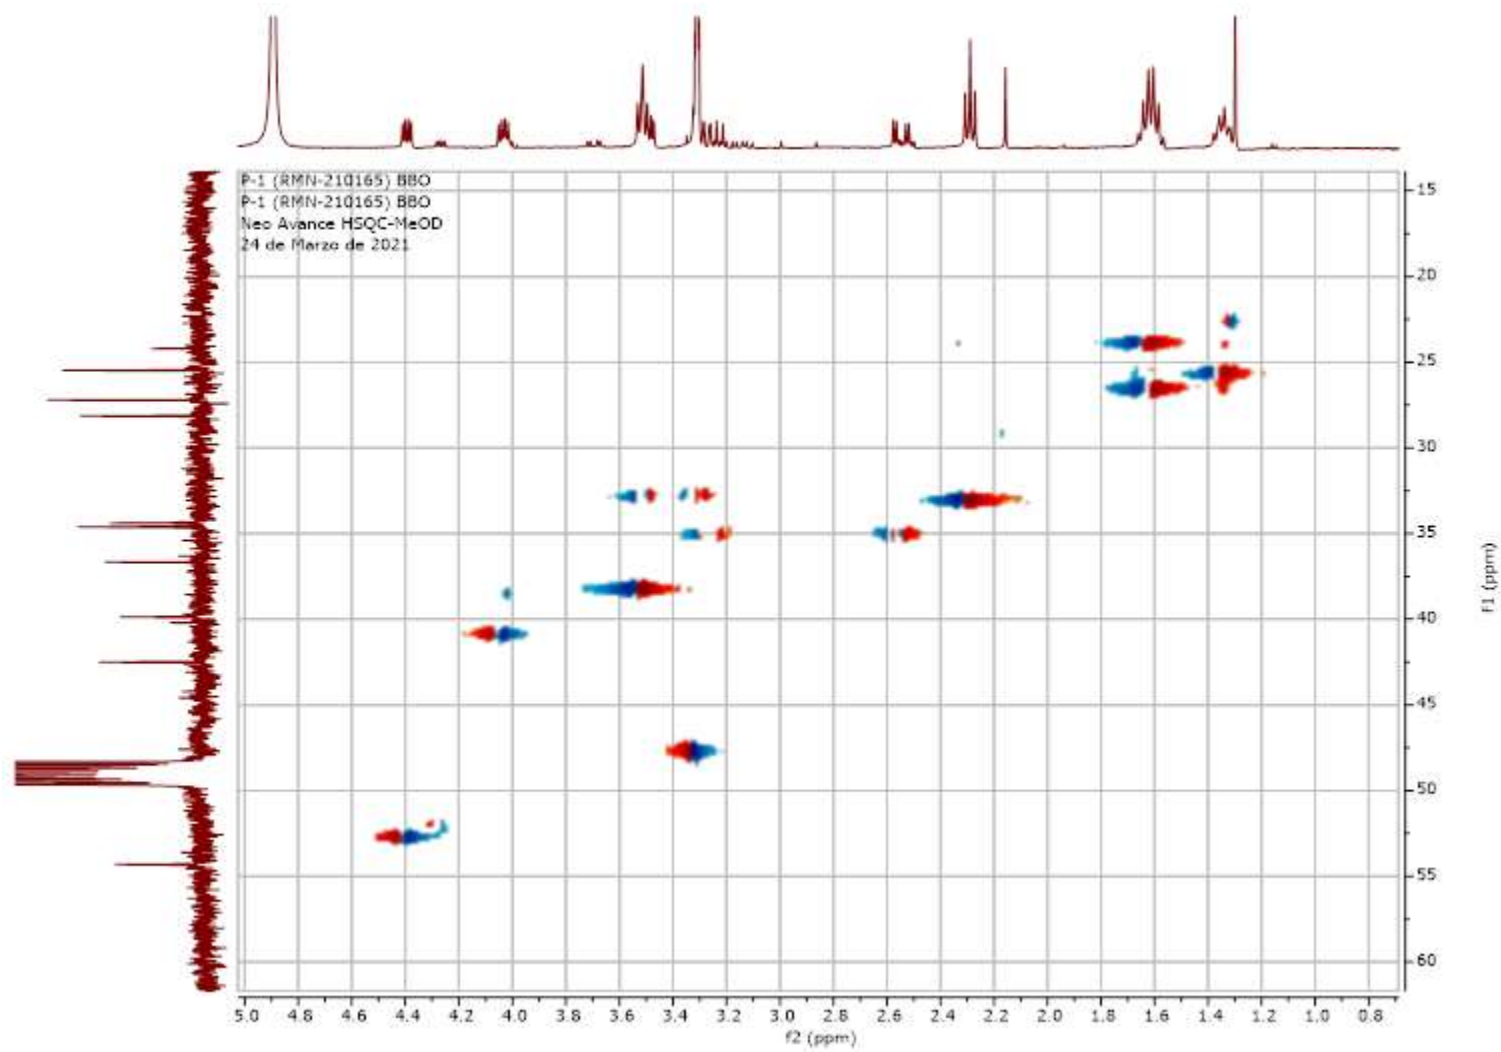

**Figure S7.**  $^1\text{H}$ -NMR HSQC spectrum (400MHz, MeOD, 303 K) of compound 2.

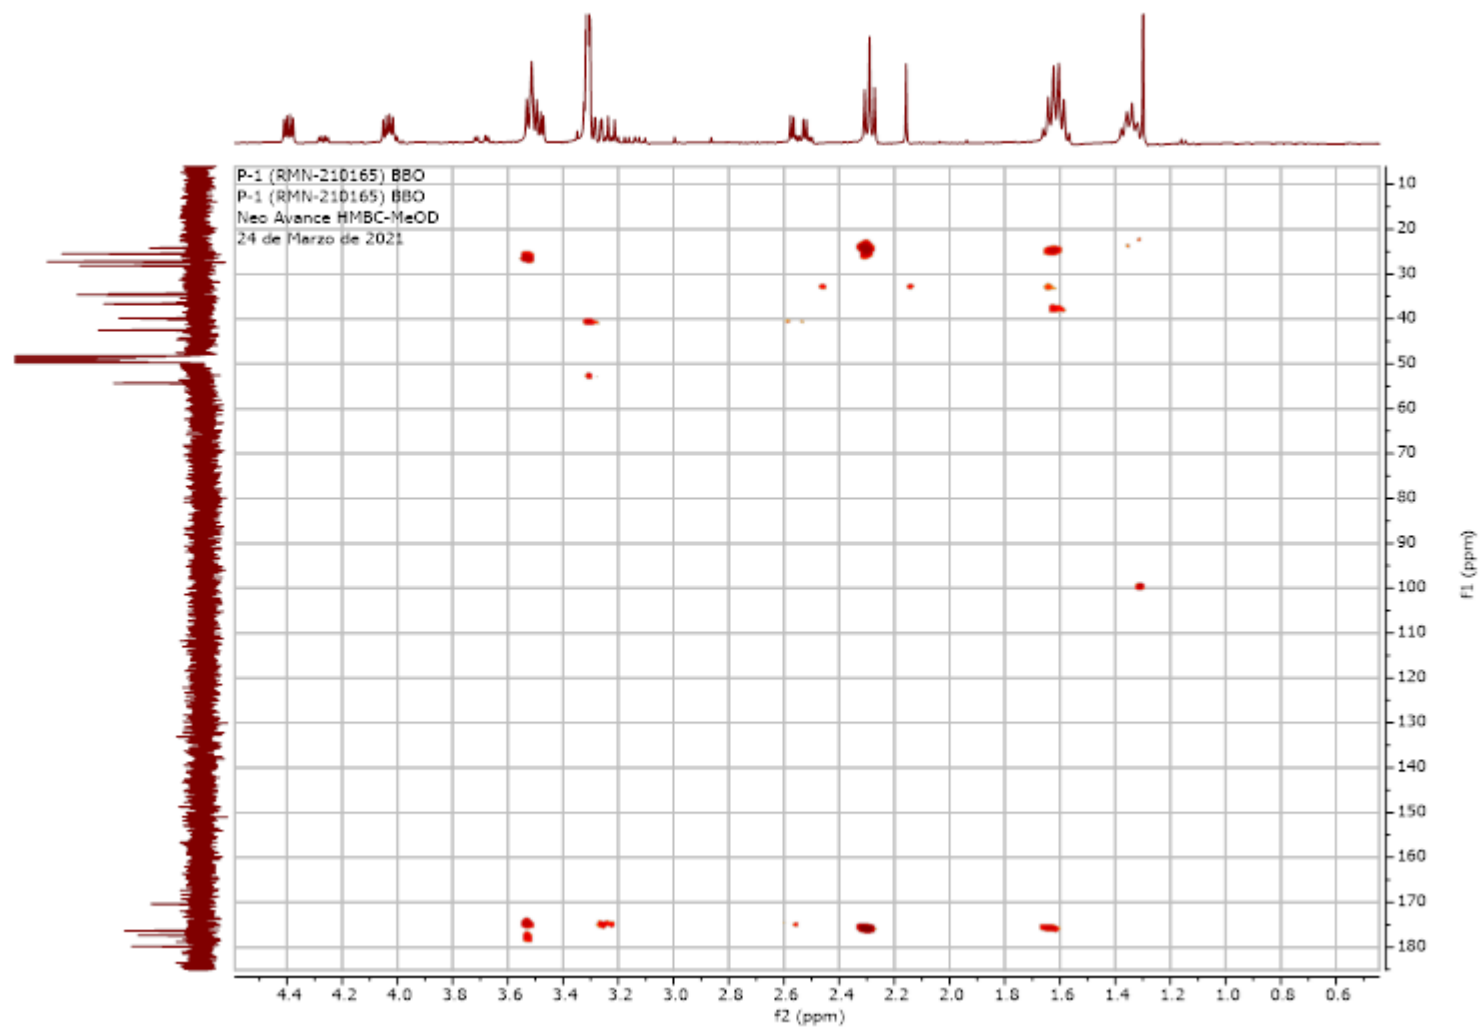

Figure S8.  $^1\text{H}$ -NMR HMBC spectrum (400MHz, MeOD, 303 K) of compound **2**.

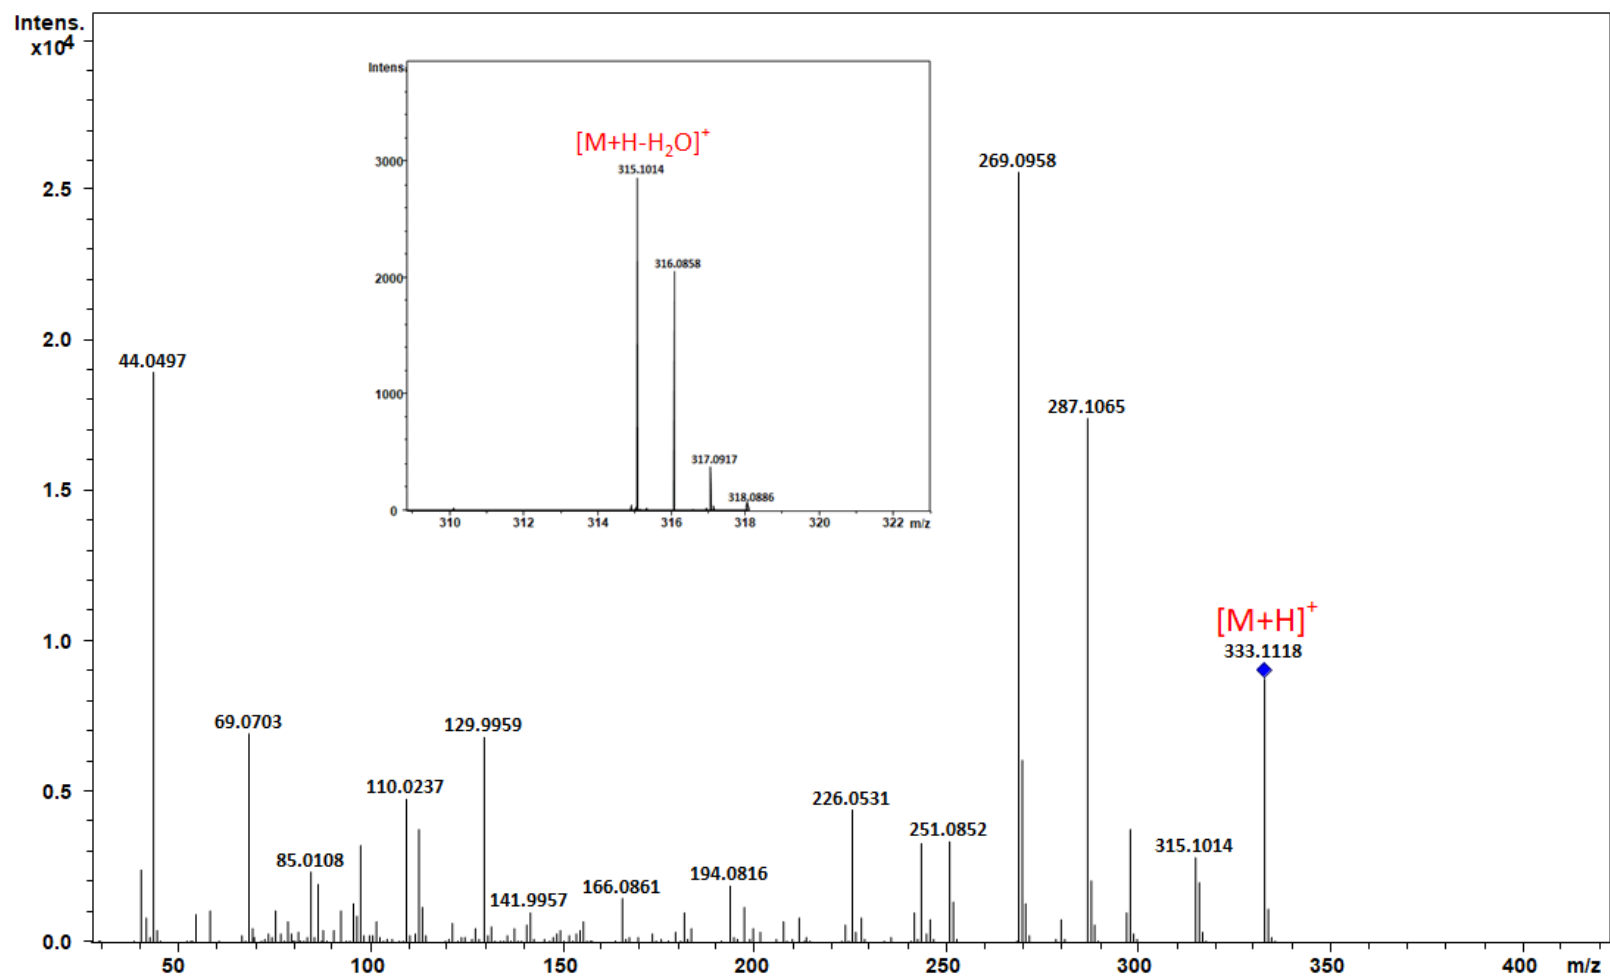

Figure S9. MS/MS for TIC of 4.6 min corresponding to compound 2.

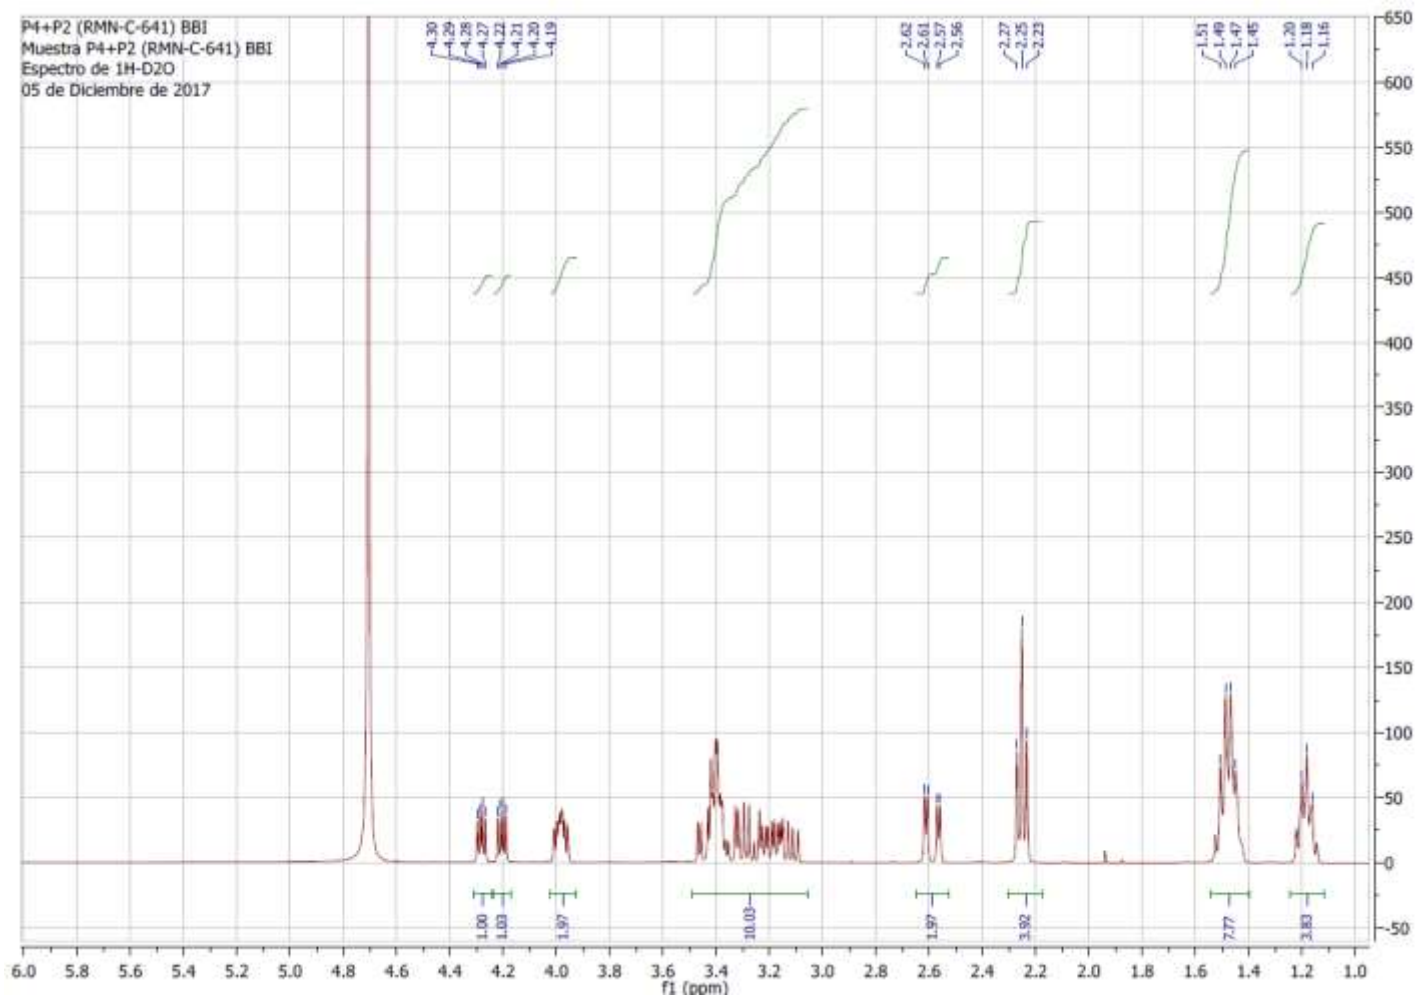

**Figure S10.**  $^1\text{H}$ -NMR spectrum (400MHz, MeOD, 303 K) of mix products.
